# Supplementary material
Source: publisher figshare collection journal article supplement (https://brill.figshare.com/ndownloader/files/21827238)
Supplement: Supplementary file 1 [file 21827238]

## Sheet: Tabelle1
mID	Yellow	Treat	Age	relyel	iID
27	40.0648	HQ	50	0.400648	1
42	45.3871	HQ	50	0.453871	2
43	43.981	HQ	50	0.43981	3
48	37.441	HQ	50	0.37441	4
52	54.4553	HQ	50	0.544553	5
55	31.7665	HQ	50	0.317665	6
58	43.1761	HQ	50	0.431761	7
60	45.2442	HQ	50	0.452442	8
67	35	HQ	50	0.35	9
27	33.3587	HQ	100	0.333587	1
42	41.9178	HQ	100	0.419178	2
43	39.7479	HQ	100	0.397479	3
48	34.3615	HQ	100	0.343615	4
52	48.6374	HQ	100	0.486374	5
55	27.1969	HQ	100	0.271969	6
58	37.5639	HQ	100	0.375639	7
60	38.475	HQ	100	0.38475	8
67	31.1549	HQ	100	0.311549	9
27	37.0665	LQ	50	0.370665	10
42	40.0394	LQ	50	0.400394	11
43	36.9987	LQ	50	0.369987	12
48	34.8325	LQ	50	0.348325	13
52	38.1399	LQ	50	0.381399	14
55	37.8881	LQ	50	0.378881	15
58	32.6311	LQ	50	0.326311	16
60	35.7422	LQ	50	0.357422	17
67	31	LQ	50	0.31	18
27	35	LQ	100	0.35	10
42	35.1942	LQ	100	0.351942	11
43	34.0819	LQ	100	0.340819	12
48	33.3146	LQ	100	0.333146	13
52	40.5134	LQ	100	0.405134	14
55	30.593	LQ	100	0.30593	15
58	27.4403	LQ	100	0.274403	16
60	36.4459	LQ	100	0.364459	17
67	28.7874	LQ	100	0.287874	18
